# Supplementary material for: Hirshfeld atom refinement of metal–organic frameworks for accurate positioning of hydrogen atoms and disorder analysis
Source: Royal Society of Chemistry journal article supplement (doi:10.1039/d3cc01369c), 2023-01-01
Supplement: d3cc01369c1.pdf [file d3cc01369c1.pdf]

## Electronic Supplementary Information

### Hirshfeld atom refinement of metal-organic frameworks for accurate positioning of hydrogen atoms and disorder analysis

Yizhi Xu,<sup>a</sup> Michał L. Chodkiewicz,<sup>a</sup> Magdalena Woińska,<sup>a</sup> Damian Trzybiński,<sup>b</sup> Ivana Brekalo,<sup>c</sup> Filip Topić,<sup>d</sup> Krzysztof Woźniak<sup>a\*</sup> and Mihails Arhangeliskis<sup>a\*</sup>

<sup>a</sup> Faculty of Chemistry, University of Warsaw, 1 Pasteura Street, 02-093 Warsaw, Poland.

<sup>b</sup> Biological and Chemical Research Centre, University of Warsaw, 101 Żwirki i Wigury Street, 02-089 Warsaw, Poland.

<sup>c</sup> Ruđer Bošković Institute, Bijenička Cesta 54, 10000 Zagreb, Croatia.

<sup>d</sup> Department of Chemistry, McGill University, 801 Sherbrooke Street West, Montreal H3A 0B8, Canada.

\*Corresponding author emails: [kwozniak@chem.uw.edu.pl](mailto:kwozniak@chem.uw.edu.pl), [m.arhangeliskis@uw.edu.pl](mailto:m.arhangeliskis@uw.edu.pl)

#### Table of Contents

|                                                                                                    |    |
|----------------------------------------------------------------------------------------------------|----|
| 1. Preparation of single crystals of ZIF-2.....                                                    | 2  |
| 2. Single crystal X-ray diffraction measurement.....                                               | 2  |
| 3. Details of fragmentation-based Hirshfeld atom refinement method.....                            | 2  |
| 4. Details of Hirshfeld atom refinement based on PAW densities with periodic boundary conditions.. | 3  |
| 5. Periodic DFT calculations.....                                                                  | 3  |
| 6. Comparison of Hirshfeld atom refinement parameters with different QM methods. ....              | 5  |
| 7. References.....                                                                                 | 12 |

## 1. Preparation of single crystals of ZIF-2

1 mmol (68.1 mg) of imidazole<sup>1</sup> was dissolved in 3 mL of N,N-dimethylformamide (dmf) and the solution was placed in a 10 mL glass vial. After that, a solution of 0.5 mmol (110.7 mg) zinc acetate dihydrate dissolved in 2 mL of propylamine was carefully layered over the imidazole-dmf solution. Single crystals of zinc imidazolate, suitable for X-ray diffraction, were obtained by liquid diffusion after several days of storing the vial at room temperature.

## 2. Single crystal X-ray diffraction measurement

A good quality single-crystal of investigated compound was selected for X-ray diffraction experiments at 100(2) K. The crystal was mounted on a MiTeGen micro-mount using paratone-N-oil (Figure S1). Diffraction data were collected on an Agilent Technologies SuperNova Dual Source diffractometer equipped with an HyPix-6000HE hybrid pixel 2-dimensional detector with CuK $\alpha$  radiation ( $\lambda = 1.54184$  Å) using CrysAlis Pro software.<sup>2</sup> During the measurement the crystal was positioned 55 mm from the detector. A total number of 882, 4112 and 8798 frames were collected at 0.5° intervals with a counting time of 0.05, 0.10 and 0.50 s, respectively. The analytical numeric absorption correction using a multifaceted crystal model based on expressions derived by R.C. Clark & J.S. Reid was applied.<sup>3</sup> The lattice parameters were obtained by least-squares fit to the optimized setting angles of the reflections collected by using the CrysAlis CCD software<sup>2</sup>. Data were reduced using the CrysAlis RED program.<sup>2</sup>

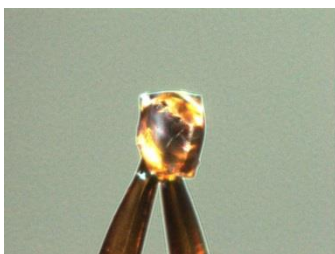

**Figure S1.** Selected single-crystal of investigated compound mounted on a MiTeGen micro-mount.

## 3. Details of fragmentation-based Hirshfeld atom refinement method

The refinement procedure starts by the fragmentation of ZIF-2 crystal structure into separate molecular fragments. In this case, seven distinct molecular fragments were defined, one representing the ZIF structure (shown in Figure 1 from main text). The remaining six fragments represent the three dmf molecules in the asymmetric unit, each present in two disordered configurations. The QM calculations were performed in Orca 5.03. Electron densities were computed for each fragment, initially using the PBE functional with cc-pVDZ basis set. The effect of the crystal field from the atoms surrounding the molecular fragments was simulated by adding multipole functions within a distance of 6 Å from every atom within the molecular fragment. To initially test the HAR method, PBE functional with cc-pVDZ

basis set were used. After each molecular wavefunction calculation, the resulting electron density was used by DiSCaMB<sup>4</sup> to obtain aspherical atomic scattering factors for a standard least squares refinement in *OLEX2*,<sup>5</sup> so that the atomic positional and thermal parameters are improved. All non-hydrogen atoms, as well as hydrogen atoms on the imidazolate rings were refined anisotropically, while the hydrogen atoms belonging to the dmf molecules were refined isotropically. Positions of imidazolate hydrogens were refined without restraints, while C-H bond lengths for the dmf hydrogens were restrained to 1.088 Å.

The QM-refinement steps were repeated in a loop until geometry convergence had been reached. Finally, the effect of using different QM methods (ie. Hartree-Fock or density functional theory with B3LYP and PBE) and four basis sets (6-31G, 6-311g, cc-pVDZ and cc-pVTZ) was tested via additional 11 structure refinements (Tables S2-S8).

#### **4. Details of Hirshfeld atom refinement based on PAW densities with periodic boundary conditions**

Hirshfeld atom refinement using aspherical atomic scattering factors obtained from periodic theoretical calculations was first implemented in the XHARPy library and for a few model structures, it was shown to yield positions and displacement parameters of hydrogen atoms as accurate as classical HAR with a cluster of charges simulating crystal environment.<sup>6</sup> The XHARPy library uses the GPAW software<sup>7,8</sup> to calculate densities derived from real-space projector augmented wave (PAW) densities with three-dimensional periodic boundary conditions. Only the valence electron density is subject to Hirshfeld partitioning, whereas the core density is assigned to the corresponding atom.

The ZIF-2 structure is a challenging case for XHARPy at its current level of development due to disorder and the presence of heavy metal atoms. Since disorder is not implemented in periodic HAR yet, we decided to exclude from refinement the minor disorder component. Using a two k-point grid (the (2, 1, 1) Monkhorst-Pack grid including  $\Gamma$  point) for the first Brillouin zone integration was possible only with the help of high performance computing. The functional employed was PBE. Real space grid spacing was 0.16 Å and the applied convergence criterion for density was  $10^{-7}$ . To overcome technical problems, XHARPy was used to obtain aspherical atomic scattering factors saved in a .tsc file, which was subsequently passed to OLEX2 for a least squares refinement of atomic positions and displacement parameters. Similarly as for fragmentation based HAR, the C-H bonds in the solvent molecules were restrained to the average neutron value of 1.088 Å and the hydrogen atoms were refined isotropically. The positions and ADPs of hydrogen atoms in the imidazolate framework were freely refined. Calculations of atomic scattering factors with periodic boundary conditions followed by least squares refinement were repeated iteratively. Periodic HAR was terminated after 16 cycles since during the last 6 cycles the maximum parameter shift oscillated between 0.063 and 0.067 of the parameter standard uncertainty.

#### **5. Periodic DFT calculations**

Periodic DFT calculations were performed in plane-wave DFT code CASTEP20.<sup>9</sup> The input structure files were prepared using cif2cell software.<sup>10</sup> Given that dmf molecules are disordered in the experimental

crystal structure, and the periodic DFT calculation requires the structural model to be fully ordered, we prepared two separate models: one containing all dmf molecules in the orientation from the major disorder component, and the other corresponding to the minor disordered component. These two structural models were then geometry-optimized and the final geometries were compared with the experimental structures refined by HAR method (see Table S1).

The crystal structures were optimized with respect to atom positions, subject to the symmetry constraints of the *Pbca* space group. The unit cell parameters were fixed at their experimental values. The calculations were performed using the PBE<sup>11</sup> functional, combined with Grimme D3<sup>12</sup> dispersion correction. The plane-wave basis set was truncated at 800 eV cutoff. The 1<sup>st</sup> electronic Brillouin zone was sampled with a  $2\pi \times 0.05 \text{ \AA}^{-1}$  k-point grid. Convergence criteria were set with respect to maximum energy change per atom ( $2 \times 10^{-5}$  eV), maximum force on atom ( $0.05 \text{ eV \AA}^{-1}$ ) and maximum atom displacement ( $0.001 \text{ \AA}$ ). The energies of the optimized structures corresponding to the major and minor disorder component are shown in Table S1.

**Table S1.** Comparison of the energies for the periodic DFT-optimized structures representing the major and minor components of the disorder of dmf molecules. The energy difference between two configurations is  $5.818 \text{ kJ mol}^{-1}$  per formula unit, which contains three dmf molecules, or  $1.939 \text{ kJ mol}^{-1}$  per dmf molecule.

| dmf disorder component | Energy per unit cell / eV | Energy per formula unit / eV | Relative energy per formula unit / $\text{kJ mol}^{-1}$ |
|------------------------|---------------------------|------------------------------|---------------------------------------------------------|
| Major                  | -94267.205                | -5891.700                    | 0.000                                                   |
| Minor                  | -94266.240                | -5891.640                    | 5.818                                                   |

## 6. Comparison of Hirshfeld atom refinement parameters with different QM methods.

**Table S2.** Summary of all refined imidazolate C-H bond lengths at each given QM method and basis set using DiSCaMB software, by standard independent atom model (IAM) or by periodic HAR method using XHARPy software<sup>6</sup> with the choice of inclusion of disordered dmf molecules, as well as those calculated by periodic DFT. The population standard deviation values are shown in the brackets.

| QM method       | Disordered dmf | Basis set      | C2-H2     | C6-H6     | C10-H10   | C11-H11   | C23-H23   | C24-H24   | C25-H25   | C26-H26   | C27-H27   | C28-H28   | C29-H29   | C30-H30   |
|-----------------|----------------|----------------|-----------|-----------|-----------|-----------|-----------|-----------|-----------|-----------|-----------|-----------|-----------|-----------|
| PBE - DiSCaMB   | yes            | 6-31G          | 1.066(17) | 1.074(16) | 1.074(17) | 1.060(19) | 1.075(19) | 1.081(19) | 1.069(17) | 1.06(2)   | 1.096(17) | 1.090(18) | 1.070(16) | 1.080(15) |
|                 | yes            | 6-311G         | 1.063(17) | 1.070(16) | 1.069(17) | 1.051(19) | 1.070(19) | 1.075(19) | 1.063(17) | 1.061(18) | 1.092(17) | 1.084(18) | 1.065(16) | 1.075(15) |
|                 | yes            | cc-pVDZ        | 1.076(17) | 1.086(16) | 1.086(16) | 1.067(19) | 1.086(19) | 1.085(19) | 1.080(17) | 1.07(2)   | 1.107(17) | 1.102(18) | 1.073(16) | 1.087(15) |
|                 | yes            | cc-pVTZ        | 1.078(17) | 1.088(16) | 1.086(16) | 1.067(19) | 1.088(19) | 1.084(19) | 1.081(17) | 1.07(2)   | 1.109(17) | 1.100(18) | 1.077(15) | 1.090(15) |
| HF - DiSCaMB    | yes            | 6-31G          | 1.062(17) | 1.072(16) | 1.071(17) | 1.060(19) | 1.073(19) | 1.077(19) | 1.067(17) | 1.06(2)   | 1.094(17) | 1.089(18) | 1.069(16) | 1.078(15) |
|                 | yes            | 6-311G         | 1.061(17) | 1.068(16) | 1.065(17) | 1.051(19) | 1.065(19) | 1.073(19) | 1.062(17) | 1.059(18) | 1.090(17) | 1.083(18) | 1.065(16) | 1.074(15) |
|                 | yes            | cc-pVDZ        | 1.076(17) | 1.083(16) | 1.086(16) | 1.064(19) | 1.086(19) | 1.085(19) | 1.080(17) | 1.07(2)   | 1.108(17) | 1.100(18) | 1.073(17) | 1.087(15) |
|                 | yes            | cc-pVTZ        | 1.078(17) | 1.086(16) | 1.086(17) | 1.066(19) | 1.086(19) | 1.084(19) | 1.083(17) | 1.07(2)   | 1.110(17) | 1.099(18) | 1.077(15) | 1.091(16) |
| B3LYP - DiSCaMB | yes            | 6-31G          | 1.061(17) | 1.066(16) | 1.063(17) | 1.054(19) | 1.068(19) | 1.070(19) | 1.060(17) | 1.06(2)   | 1.092(19) | 1.085(18) | 1.063(17) | 1.074(15) |
|                 | yes            | 6-311G         | 1.058(17) | 1.063(16) | 1.059(17) | 1.052(19) | 1.066(17) | 1.068(19) | 1.058(17) | 1.06(2)   | 1.089(17) | 1.081(18) | 1.060(16) | 1.071(15) |
|                 | yes            | cc-pVDZ        | 1.074(17) | 1.079(16) | 1.081(17) | 1.071(19) | 1.084(19) | 1.07(2)   | 1.079(17) | 1.07(2)   | 1.106(19) | 1.096(18) | 1.068(17) | 1.085(16) |
|                 | yes            | cc-pVTZ        | 1.077(17) | 1.083(16) | 1.083(17) | 1.073(19) | 1.088(19) | 1.08(2)   | 1.082(17) | 1.07(2)   | 1.112(19) | 1.097(18) | 1.072(17) | 1.089(17) |
| IAM             | yes            | N/A            | 0.937(19) | 0.954(18) | 0.942(17) | 0.93(2)   | 0.96(2)   | 0.94(2)   | 0.921(17) | 0.95(2)   | 0.962(17) | 0.966(19) | 0.937(17) | 0.938(17) |
| DFT             | major          |                | 1.084     | 1.085     | 1.086     | 1.084     | 1.083     | 1.083     | 1.088     | 1.081     | 1.086     | 1.084     | 1.085     | 1.084     |
|                 | minor          |                | 1.084     | 1.085     | 1.087     | 1.084     | 1.083     | 1.084     | 1.087     | 1.081     | 1.085     | 1.084     | 1.086     | 1.084     |
| PBE - DiSCaMB   | no             | cc-pVTZ        | 1.07(4)   | 1.09(3)   | 1.06(3)   | 1.09(5)   | 1.08(3)   | 1.04(4)   | 1.09(3)   | 1.06(3)   | 1.11(4)   | 1.03(4)   | 1.08(4)   | 1.10(3)   |
| IAM             | no             | N/A            | 0.93(3)   | 0.94(3)   | 0.89(3)   | 0.97(4)   | 0.96(4)   | 0.90(4)   | 0.93(3)   | 0.94(3)   | 0.97(3)   | 0.92(3)   | 0.92(3)   | 0.95(3)   |
| PBE - XHARPy    | no             | real-space PAW | 1.07(4)   | 1.08(3)   | 1.06(3)   | 1.08(5)   | 1.08(3)   | 1.03(5)   | 1.08(4)   | 1.06(4)   | 1.11(4)   | 1.02(4)   | 1.08(4)   | 1.09(3)   |

**Table S3.** Crystal data and structure refinement details, shared for all HAR calculations. For geometry analysis and refinement statistics for different QM methods and basis sets see Tables S4-S8.

|                                        |                                                              |
|----------------------------------------|--------------------------------------------------------------|
| Empirical formula                      | $C_{12}H_{12}N_8Zn_2 (C_3H_7NO)_3$                           |
| Formula weight                         | 618.36                                                       |
| Temperature/K                          | 100(2)                                                       |
| Crystal system                         | orthorhombic                                                 |
| Space group                            | <i>Pbca</i>                                                  |
| a / Å                                  | 9.63356(3)                                                   |
| b / Å                                  | 24.09227(7)                                                  |
| c / Å                                  | 24.40968(8)                                                  |
| $\alpha / ^\circ$                      | 90                                                           |
| $\beta / ^\circ$                       | 90                                                           |
| $\gamma / ^\circ$                      | 90                                                           |
| Volume / Å <sup>3</sup>                | 5665.35(3)                                                   |
| Z                                      | 8                                                            |
| $\rho_{\text{calc}} / \text{g/cm}^3$   | 1.450                                                        |
| $\mu / \text{mm}^{-1}$                 | 2.445                                                        |
| F(000)                                 | 2560                                                         |
| Crystal size / mm <sup>3</sup>         | 0.30 x 0.28 x 0.22                                           |
| Radiation                              | CuK $\alpha$ ( $\lambda = 1.5406 \text{ \AA}$ )              |
| $\Theta$ range for data collection / ° | 4.504 to 50.246                                              |
| Index ranges                           | $-12 \leq h \leq 12, -30 \leq k \leq 30, -31 \leq l \leq 30$ |
| Reflections collected                  | 159869                                                       |
| Independent reflections                | 6081                                                         |

**Table S4.** General refinement statistics of using a given QM method and basis set with DiSCaMB software, the standard IAM or periodic HAR method with XHARPy software are summarized here (PBE method with cc-pVTZ is used as a reference). The effects of including disordered dmf molecules are also considered.  $R1(I>2 \text{ sigma})$  is the regression coefficient of the least squares fit for the atomic positions to the experimental electron density,  $R1(\text{all } I)$  and  $wR_2$  is the discrepancy factor,  $\text{gof}$  is the goodness of fit and  $\text{max/min peak}$  is the maximum/minimum atomic peak heights.

| QM method       | CCDC deposition number | Disordered dmf | Basis set      | $R1(I>2 \text{ sigma})$ | $R1(\text{all } I)$ | $wR_2(I>2 \text{ sigma})$ | $\text{gof}$ | Residual density / electrons $\text{\AA}^{-3}$ |         |
|-----------------|------------------------|----------------|----------------|-------------------------|---------------------|---------------------------|--------------|------------------------------------------------|---------|
|                 |                        |                |                |                         |                     |                           |              | peak                                           | hole    |
| PBE - DiSCaMB   | 2248339                | yes            | 6-31G          | 0.0224                  | 0.0229              | 0.0566                    | 1.0946       | 0.1752                                         | -0.3216 |
|                 | 2248338                | yes            | 6-311G         | 0.0225                  | 0.023               | 0.0566                    | 1.0954       | 0.1805                                         | -0.3235 |
|                 | 2248340                | yes            | cc-pVDZ        | 0.0221                  | 0.0226              | 0.0557                    | 1.0768       | 0.1721                                         | -0.3164 |
| HF - DiSCaMB    | 2248333                | yes            | 6-31G          | 0.0219                  | 0.0225              | 0.0559                    | 1.0822       | 0.1864                                         | -0.3043 |
|                 | 2248332                | yes            | 6-311G         | 0.0219                  | 0.0224              | 0.0557                    | 1.0785       | 0.1861                                         | -0.2931 |
|                 | 2248334                | yes            | cc-pVDZ        | 0.0216                  | 0.0222              | 0.0551                    | 1.0662       | 0.177                                          | -0.3032 |
|                 | 2248335                | yes            | cc-pVTZ        | 0.0217                  | 0.0222              | 0.0551                    | 1.0672       | 0.1792                                         | -0.3001 |
| B3LYP - DiSCaMB | 2248320                | yes            | 6-31G          | 0.0223                  | 0.0228              | 0.0565                    | 1.0935       | 0.1774                                         | -0.3174 |
|                 | 2248319                | yes            | 6-311G         | 0.0224                  | 0.0229              | 0.0565                    | 1.0932       | 0.1814                                         | -0.3187 |
|                 | 2248321                | yes            | cc-pVDZ        | 0.0219                  | 0.0225              | 0.0555                    | 1.0747       | 0.17                                           | -0.3106 |
|                 | 2248322                | yes            | cc-pVTZ        | 0.0220                  | 0.0226              | 0.0555                    | 1.0742       | 0.1766                                         | -0.3280 |
| IAM             | 2263423                | yes            | N/A            | 0.0275                  | 0.0280              | 0.0723                    | 1.0475       | 0.3000                                         | -0.4457 |
| IAM             | 2263462                | no             | N/A            | 0.0434                  | 0.0441              | 0.1241                    | 1.0368       | 1.6194                                         | -0.6543 |
| PBE - DiSCaMB   | 2263454                | no             | cc-pVTZ        | 0.0419                  | 0.0426              | 0.1201                    | 1.0251       | 1.6409                                         | -0.813  |
| PBE - XHARPy    | 2263422                | no             | real-space PAW | 0.0418                  | 0.0426              | 0.1225                    | 1.0444       | 1.6578                                         | -0.8149 |

**Table S5.** Statistics for comparison of imidazolate C-H bond lengths, using various QM methods and basis sets with DisCaMB software, IAM or periodic HAR method with XHARPy software. The effects of inclusion of disordered dmf molecules are also investigated. PBE method with cc-pVTZ refinement was used as the reference for bond lengths.  $|R_x - R_r|$  is the average absolute bond length difference compared to the reference bond length; sd is the population standard deviation; wRMSD( $\Delta R$ ) is the weighted root mean squared deviant of the imidazolate C-H bond lengths;  $R_x - R_r$  is the average bond length difference compared to the reference bond length;  $R_x / R_r$  is the average bond length ratio compared to the reference bond length and finally  $R_x$  are the averaged bond lengths.

| QM method       | Disordered dmf | Basis set      | $ R_x - R_r $ | sd     | wRMSD( $\Delta R$ ) | $R_x - R_r$ | $R_x / R_r$ | $R_x$  |
|-----------------|----------------|----------------|---------------|--------|---------------------|-------------|-------------|--------|
| PBE - DiSCaMB   | yes            | 6-31G          | 0.0105        | 0.0063 | 0.5046              | -0.0105     | 0.9904      | 1.0742 |
|                 | yes            | 6-311G         | 0.0146        | 0.0063 | 0.6966              | -0.0146     | 0.9865      | 1.0701 |
|                 | yes            | cc-pVDZ        | 0.0014        | 0.0064 | 0.0764              | -0.0011     | 0.9990      | 1.0836 |
| HF - DiSCaMB    | yes            | 6-31G          | 0.0174        | 0.0064 | 0.8165              | -0.0174     | 0.9840      | 1.0673 |
|                 | yes            | 6-311G         | 0.0203        | 0.0064 | 0.9481              | -0.0203     | 0.9813      | 1.0644 |
|                 | yes            | cc-pVDZ        | 0.0051        | 0.0066 | 0.2572              | -0.0049     | 0.9955      | 1.0798 |
|                 | yes            | cc-pVTZ        | 0.0028        | 0.0066 | 0.1384              | -0.0014     | 0.9987      | 1.0833 |
| B3LYP - DiSCaMB | yes            | 6-31G          | 0.0124        | 0.0063 | 0.5911              | -0.0124     | 0.9886      | 1.0723 |
|                 | yes            | 6-311G         | 0.0167        | 0.0063 | 0.7950              | -0.0167     | 0.9846      | 1.0680 |
|                 | yes            | cc-pVDZ        | 0.0018        | 0.0064 | 0.1033              | -0.0015     | 0.9987      | 1.0832 |
|                 | yes            | cc-pVTZ        | 0.0008        | 0.0064 | 0.0482              | 0.0004      | 1.0004      | 1.0851 |
| IAM             | yes            | N/A            | 0.1394        | 0.0071 | 5.7981              | -0.1394     | 0.8715      | 0.9453 |
| IAM             | no             | N/A            | 0.1506        | 0.0104 | 4.3199              | -0.1506     | 0.8612      | 0.9341 |
| PBE - DiSCaMB   | no             | cc-pVTZ        | 0.0184        | 0.0108 | 0.6713              | -0.0113     | 0.9897      | 1.0734 |
| PBE - XHARPy    | no             | real-space PAW | 0.0172        | 0.0111 | 0.6472              | -0.0148     | 0.9865      | 1.0699 |



**Table S6.** Statistics for comparison of anisotropic imidazolate hydrogen atoms with different QM methods and basis sets using DiSCaMB software or periodic HAR method using XHARPy software with or without disorder of dmf molecules (using PBE method with cc-pVTZ as a reference for ADP values).  $|\Delta U_{ij}|$  is the average absolute difference of ADP tensor components;  $wRSMD(\Delta U_{ij})$  is the weighted root mean square deviation for components of ADP tensor;  $U_{ijx}/U_{ijr}$  is the average ratio of ADP tensor components;  $S_{12}$  is the ADP similarity index;  $V_x/V_r$  is the ratio of X-ray to reference thermal ellipsoids; sigma is the population standard deviation of the averaged ADP tensor components; and  $|\Delta U_{ij}|/|U_{ij}|$  is the ration of average absolute difference of ADP tensor components to average absolute value of ADP tensor components.

| QM method       | Disordered dmf | Basis set      | $ \Delta U_{ij} $ | $wRSMD(\Delta U_{ij})$ | $U_{iix}/U_{iir}$ | $S_{12}$ | $V_x/V_r$ | sigma  | $ \Delta U_{ij} / U_{ij} $ |
|-----------------|----------------|----------------|-------------------|------------------------|-------------------|----------|-----------|--------|----------------------------|
| PBE - DiSCaMB   | Yes            | 6-31G          | 0.0023            | 0.1973                 | 0.9378            | 3.7649   | 0.5158    | 0.0113 | 0.0631                     |
|                 | Yes            | 6-311G         | 0.0023            | 0.2090                 | 0.9421            | 4.5640   | 0.4842    | 0.0111 | 0.0637                     |
|                 | Yes            | cc-pVDZ        | 0.0020            | 0.1551                 | 0.9464            | 0.1978   | 0.8647    | 0.0114 | 0.0586                     |
| HF - DiSCaMB    | Yes            | 6-31G          | 0.0030            | 0.2285                 | 0.9744            | 0.7509   | 1.1128    | 0.0113 | 0.0778                     |
|                 | Yes            | 6-311G         | 0.0030            | 0.2294                 | 0.9712            | 0.6656   | 1.0993    | 0.0112 | 0.0787                     |
|                 | Yes            | cc-pVDZ        | 0.0061            | 0.4622                 | 1.0485            | 4.2725   | 1.7618    | 0.0117 | 0.1627                     |
|                 | Yes            | cc-pVTZ        | 0.0051            | 0.3935                 | 1.0906            | 3.6159   | 1.9750    | 0.0118 | 0.1363                     |
| B3LYP - DiSCaMB | Yes            | 6-31G          | 0.0020            | 0.1689                 | 0.9567            | 1.8150   | 0.6406    | 0.0113 | 0.0559                     |
|                 | Yes            | 6-311G         | 0.0020            | 0.1790                 | 0.9599            | 2.1188   | 0.6113    | 0.0111 | 0.0549                     |
|                 | Yes            | cc-pVDZ        | 0.0020            | 0.1547                 | 0.9727            | 0.3573   | 1.0386    | 0.0115 | 0.0573                     |
|                 | Yes            | cc-pVTZ        | 0.0009            | 0.0682                 | 1.0283            | 0.1449   | 1.1863    | 0.0114 | 0.0234                     |
| PEB - DisCaMB   | No             | cc-pVTZ        | 0.0152            | 0.7439                 | 1.0482            | 12.4895  | 1.0292    | 0.0224 | 0.3963                     |
| PBE - XHARPy    | No             | real-space PAW | 0.0157            | 0.7432                 | 1.0920            | 12.0769  | 1.1290    | 0.1290 | 0.4141                     |

**Table S7.** Statistics for averaged non-hydrogen atom ADP comparisons using various QM methods and basis sets using DiSCaMB software or periodic HAR method using XHARPy software with the choice of disordered dmf molecules (PBE method with cc-pVTZ refinement is the reference for ADP values).  $|U_{ijx} - U_{ijr}|$  is the average absolute difference of ADP tensor components;  $wRSMD(\Delta U_{ij})$  is the weighted root mean square deviation for components of ADP tensor and  $U_{ijx}/U_{ijr}$  is the average ration of ADP tensor components.

| QM method          | Disordered |                   | $ U_{ijx} - U_{ijr} $ | $wRSMD(\Delta U_{ij})$ | $U_{ijx}/U_{ijr}$ |
|--------------------|------------|-------------------|-----------------------|------------------------|-------------------|
|                    | dmf        | Basis set         |                       |                        |                   |
| PBE - DiSCaMB      | Yes        | 6-31G             | 0.0007                | 0.6558                 | 1.0154            |
|                    | Yes        | 6-311G            | 0.0007                | 0.6522                 | 1.0259            |
|                    | Yes        | cc-pVDZ           | 0.0003                | 0.3180                 | 0.9993            |
| HF - DiSCaMB       | Yes        | 6-31G             | 0.0008                | 0.6925                 | 0.9948            |
|                    | Yes        | 6-311G            | 0.0009                | 0.7284                 | 0.9902            |
|                    | Yes        | cc-pVDZ           | 0.0010                | 0.7527                 | 0.9605            |
|                    | Yes        | cc-pVTZ           | 0.0011                | 0.8050                 | 0.9537            |
| B3LYP -<br>DiSCaMB | Yes        | 6-31G             | 0.0006                | 0.6537                 | 1.0113            |
|                    | Yes        | 6-311G            | 0.0006                | 0.6220                 | 1.0220            |
|                    | Yes        | cc-pVDZ           | 0.0004                | 0.3686                 | 0.9893            |
|                    | Yes        | cc-pVTZ           | 0.0002                | 0.1597                 | 0.9914            |
| PBE - DiSCaMB      | No         | cc-pVTZ           | 0.0005                | 0.9025                 | 0.9683            |
| PBE - XHARPy       | No         | real-space<br>PAW | 0.0005                | 0.7765                 | 0.9704            |

**Table S8.** Maximum discrepancies of anisotropic imidazolate hydrogen atoms for each QM method and basis set using DiSCaMB software or by periodic HAR method using XHARPy software with the choice disordered dmf molecules, using PBE method with cc-pVTZ refinement as the reference ADPs.  $|U_x - U_r|$  is the average absolute difference of ADP tensor components;  $S_{12}$  is the ADP similarity index and min/max  $V_x/V_r$  is the maximum/minimum ratio of X-ray thermal ellipsoids to reference thermal ellipsoids.

| QM method          | Disordered dmf | Basis set             | $ U_x - U_r $ | atom | wRMSD  | atom | $S_{12}$ | atom | min $V_x/V_r$ | atom | max $V_x/V_r$ | atom |
|--------------------|----------------|-----------------------|---------------|------|--------|------|----------|------|---------------|------|---------------|------|
| PBE -<br>DiSCaMB   | Yes            | 6-31G                 | 0.0028        | H23  | 0.2413 | H10  | 14.6246  | H10  | 0.1971        | H10  | 0.7347        | H24  |
|                    | Yes            | 6-311G                | 0.0031        | H26  | 0.2856 | H26  | 15.7841  | H28  | 0.1795        | H28  | 0.7112        | H24  |
|                    | Yes            | cc-pVDZ               | 0.0031        | H25  | 0.2291 | H25  | 0.4993   | H30  | 0.7557        | H30  | 0.9430        | H29  |
| HF -<br>DiSCaMB    | Yes            | 6-31G                 | 0.0057        | H11  | 0.3352 | H11  | 2.7395   | H6   | 0.8271        | H25  | 1.6041        | H6   |
|                    | Yes            | 6-311G                | 0.0060        | H11  | 0.3505 | H11  | 2.5604   | H6   | 0.8426        | H25  | 1.5780        | H6   |
|                    | Yes            | cc-pVDZ               | 0.0095        | H24  | 0.5704 | H24  | 7.1525   | H23  | 1.3151        | H24  | 2.3711        | H28  |
|                    | Yes            | cc-pVTZ               | 0.0078        | H24  | 0.4908 | H26  | 7.1519   | H23  | 1.4635        | H24  | 2.6402        | H28  |
| B3LYP -<br>DiSCaMB | Yes            | 6-31G                 | 0.0026        | H23  | 0.2133 | H10  | 7.5502   | H10  | 0.3433        | H10  | 0.7985        | H6   |
|                    | Yes            | 6-311G                | 0.0028        | H11  | 0.2330 | H26  | 5.6810   | H28  | 0.3970        | H28  | 0.7826        | H6   |
|                    | Yes            | cc-pVDZ               | 0.0029        | H24  | 0.2033 | H25  | 0.6382   | H28  | 0.8957        | H30  | 1.1858        | H28  |
|                    | Yes            | cc-pVTZ               | 0.0012        | H26  | 0.0906 | H26  | 0.4011   | H23  | 1.0958        | H24  | 1.3259        | H28  |
| PBE -<br>DiSCaMB   | No             | cc-pVTZ               | 0.0334        | H28  | 1.3069 | H28  | 34.8436  | H30  | 0.0353        | H30  | 1.9253        | H2   |
| PBE -<br>XHARPy    | No             | real-<br>space<br>PAW | 0.0328        | H28  | 1.2445 | H28  | 23.7639  | H28  | 0.1001        | H30  | 2.1440        | H2   |

## 7. References

- 1 Y.-Q. Tian, Y.-M. Zhao, Z.-X. Chen, G.-N. Zhang, L.-H. Weng and D.-Y. Zhao, *Chem. Eur. J.*, 2007, **13**, 4146–4154.
- 2 2008.
- 3 R. C. Clark and J. S. Reid, *Acta Crystallogr.*, 1995, **A51**, 887–897.
- 4 M. L. Chodkiewicz, S. Migacz, W. Rudnicki, A. Makal, J. A. Kalinowski, N. W. Moriarty, R. W. Grosse-Kunstleve, P. V. Afonine, P. D. Adams and P. M. Dominiak, *J. Appl. Crystallogr.*, 2018, **51**, 193–199.
- 5 O. V. Dolomanov, L. J. Bourhis, R. J. Gildea, J. A. K. Howard and H. Puschmann, *J. Appl. Crystallogr.*, 2009, **42**, 339–341.
- 6 P. N. Ruth, R. Herbst-Irmer and D. Stalke, *IUCrJ*, 2022, **9**, 286–297.
- 7 J. J. Mortensen, L. B. Hansen and K. W. Jacobsen, *Phys. Rev. B - Condens. Matter Mater. Phys.*, 2005, **71**, 1–11.
- 8 J. Enkovaara, C. Rostgaard, J. J. Mortensen, J. Chen, M. Dułak, L. Ferrighi, J. Gavnholt, C. Glinsvad, V. Haikola, H. A. Hansen, H. H. Kristoffersen, M. Kuisma, A. H. Larsen, L. Lehtovaara, M. Ljungberg, O. Lopez-Acevedo, P. G. Moses, J. Ojanen, T. Olsen, V. Petzold, N. A. Romero, J. Stausholm-Møller, M. Strange, G. A. Tritsarlis, M. Vanin, M. Walter, B. Hammer, H. Häkkinen, G. K. H. Madsen, R. M. Nieminen, J. K. Nørskov, M. Puska, T. T. Rantala, J. Schiøtz, K. S. Thygesen and K. W. Jacobsen, *J. Phys. Condens. Matter*, 2010, **22**, 253202.
- 9 S. J. Clark, M. D. Segall, C. J. Pickard, P. J. Hasnip, M. I. J. Probert, K. Refson and M. C. Payne, *Z. Kristallogr.*, 2005, **220**, 567–570.
- 10 T. Björkman, *Comput. Phys. Commun.*, 2011, **182**, 1183–1186.
- 11 J. P. Perdew, K. Burke and M. Ernzerhof, *Phys. Rev. Lett.*, 1996, **77**, 3865–3868.
- 12 S. Grimme, J. Antony, S. Ehrlich and H. Krieg, *J. Chem. Phys.*, 2010, **132**, 154104.
